# Supplementary material for: Similarity-Based Methods and Machine Learning Approaches for Target Prediction in Early Drug Discovery: Performance and Scope
Source: MDPI journal article supplement (doi:10.3390/ijms21103585), 2020-05-19
Supplement: s1 [file s1]

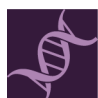

Supporting information for

# Similarity-based methods and machine learning approaches for target prediction in early drug discovery: performance and scope

Neann Mathai<sup>1</sup> and Johannes Kirchmair<sup>1,2,\*</sup>

<sup>1</sup> Department of Chemistry and Computational Biology Unit (CBU), University of Bergen, N-5020 Bergen, Norway

<sup>2</sup> Department of Pharmaceutical Chemistry, Faculty of Life Sciences, University of Vienna, 1090 Vienna, Austria

\* Correspondence: johannes.kirchmair@univie.ac.at

The data of success and recovery rates presented in the graphs of the paper are reported below. The percentage indicates the success and recovery rates, while the numbers in the brackets show how many queries (success rate) or bioactivities (recovery rate) within the TC interval had a hit.

## Similarity-based approach

Standard testing scenario with external data

**Table S1.** Success rates under the standard testing scenario with external data by the similarity approach

| median<br>maxTC | [0.8, 1]                    | [0.6, 0.8]                  | [0.4, 0.6]                | [0.2, 0.4]               | [0.0, 0.2]             | overall                     |
|-----------------|-----------------------------|-----------------------------|---------------------------|--------------------------|------------------------|-----------------------------|
| top-1           | 97.85%<br>(17560/<br>17946) | 88.29%<br>(15486/<br>17539) | 32.94%<br>(1973/<br>5989) | 6.98%<br>(208/<br>2982)  | 5.19%<br>(8/<br>154)   | 78.98%<br>(35235/<br>44610) |
| top-3           | 99.74%<br>(17899/<br>17946) | 96.61%<br>(16945/<br>17539) | 50.63%<br>(3032/<br>5989) | 12.17%<br>(363/<br>2982) | 7.79%<br>(12/<br>154)  | 85.75%<br>(38251/<br>44610) |
| top-5           | 99.96%<br>(17939/<br>17946) | 98.66%<br>(17304/<br>17539) | 60.96%<br>(3651/<br>5989) | 15.19%<br>(453/<br>2982) | 8.44%<br>(13/<br>154)  | 88.23%<br>(39360/<br>44610) |
| top-10          | 99.98%<br>(17943/<br>17946) | 99.70%<br>(17486/<br>17539) | 77.63%<br>(4649/<br>5989) | 21.09%<br>(629/<br>2982) | 9.09%<br>(14/<br>154)  | 91.28%<br>(40721/<br>44610) |
| top-15          | 99.98%<br>(17943/<br>17946) | 99.88%<br>(17518/<br>17539) | 85.72%<br>(5134/<br>5989) | 27.80%<br>(829/<br>2982) | 10.39%<br>(16/<br>154) | 92.89%<br>(41440/<br>44610) |

**Table S2.** Recovery rates under the standard testing scenario with external data by the similarity approach

| maxTC  | [0.8, 1]                    | [0.6, 0.8)                  | [0.4, 0.6)                 | [0.2, 0.4)               | [0.0, 0.2)        | overall                     |
|--------|-----------------------------|-----------------------------|----------------------------|--------------------------|-------------------|-----------------------------|
| top-1  | 67.82%<br>(18368/<br>27084) | 55.34%<br>(15480/<br>27972) | 12.65%<br>(1341/<br>10603) | 0.66%<br>(45/ 6767)      | 0.15%<br>(1/ 677) | 48.20%<br>(35235/<br>73103) |
| top-3  | 94.73%<br>(25658/<br>27084) | 85.51%<br>(23919/<br>27972) | 29.05%<br>(3080/<br>10603) | 1.86%<br>(126/<br>6767)  | 0.15%<br>(1/ 677) | 72.20%<br>(52784/<br>73103) |
| top-5  | 98.91%<br>(26788/<br>27084) | 93.59%<br>(26179/<br>27972) | 40.48%<br>(4292/<br>10603) | 3.16%<br>(214/<br>6767)  | 0.30%<br>(2/ 677) | 78.62%<br>(57475/<br>73103) |
| top-10 | 99.87%<br>(27049/<br>27084) | 98.39%<br>(27523/<br>27972) | 60.95%<br>(6463/<br>10603) | 6.34%<br>(429/<br>6767)  | 0.44%<br>(3/ 677) | 84.08%<br>(61467/<br>73103) |
| top-15 | 99.96%<br>(27074/<br>27084) | 99.32%<br>(27782/<br>27972) | 72.76%<br>(7715/<br>10603) | 10.64%<br>(720/<br>6767) | 0.59%<br>(4/ 677) | 86.58%<br>(63295/<br>73103) |

Standard time-split and close-to-real world testing scenarios

**Table S3.** Success rates under the time-split and close-to-real-world testing scenarios by the similarity approach

| median<br>maxTC | time-split scenario    |                           |                           |                           |                        |                             | close-to-<br>real-world<br>scenario |
|-----------------|------------------------|---------------------------|---------------------------|---------------------------|------------------------|-----------------------------|-------------------------------------|
|                 | [0.8, 1]               | [0.6, 0.8)                | [0.4, 0.6)                | [0.2, 0.4)                | [0.0, 0.2)             | overall                     |                                     |
| top-1           | 95.59%<br>(1518/ 1588) | 88.61%<br>(4147/<br>4680) | 57.81%<br>(3055/<br>5285) | 8.68%<br>(565/<br>6510)   | 0.69%<br>(8/ 1160)     | 48.34%<br>(9293/<br>19223)  | 46.32%<br>(9293/ 20061)             |
| top-3           | 98.74%<br>(1568/ 1588) | 95.62%<br>(4475/<br>4680) | 76.31%<br>(4033/<br>5285) | 15.44%<br>(1005/<br>6510) | 1.03%<br>(12/<br>1160) | 57.71%<br>(11093/<br>19223) | 55.30%<br>(11093/<br>20061)         |
| top-5           | 99.75%<br>(1584/ 1588) | 97.37%<br>(4557/<br>4680) | 82.65%<br>(4368/<br>5285) | 19.43%<br>(1265/<br>6510) | 1.38%<br>(16/<br>1160) | 61.33%<br>(11790/<br>19223) | 58.77%<br>(11790/<br>20061)         |
| top-10          | 99.87%<br>(1586/ 1588) | 99.08%<br>(4637/<br>4680) | 90.26%<br>(4770/<br>5285) | 26.31%<br>(1713/<br>6510) | 1.81%<br>(21/<br>1160) | 66.21%<br>(12727/<br>19223) | 63.44%<br>(12727/<br>20061)         |
| top-15          | 99.87%<br>(1586/ 1588) | 99.62%<br>(4662/<br>4680) | 93.72%<br>(4953/<br>5285) | 31.08%<br>(2023/<br>6510) | 1.98%<br>(23/<br>1160) | 68.91%<br>(13247/<br>19223) | 66.03%<br>(13247/<br>20061)         |

**Table S4.** Recovery rates under the time-split and close-to-real-world testing scenarios with by the similarity approach

| maxTC  | time-split scenario       |                           |                           |                            |                       | close-to-real-world scenario |                             |
|--------|---------------------------|---------------------------|---------------------------|----------------------------|-----------------------|------------------------------|-----------------------------|
|        | [0.8, 1]                  | [0.6, 0.8]                | [0.4, 0.6]                | [0.2, 0.4]                 | [0.0, 0.2]            | overall                      |                             |
| top-1  | 70.10%<br>(1611/<br>2298) | 62.63%<br>(4426/<br>7067) | 35.74%<br>(2983/<br>8346) | 2.61%<br>(273/<br>10462)   | 0.00%<br>(0/<br>2029) | 30.77%<br>(9293/<br>30202)   | 29.50% (9293/<br>31498)     |
| top-3  | 94.04%<br>(2161/<br>2298) | 88.67%<br>(6266/<br>7067) | 61.71%<br>(5150/<br>8346) | 6.88%<br>(720/<br>10462)   | 0.00%<br>(0/<br>2029) | 47.34%<br>(14297/<br>30202)  | 45.39%<br>(14297/<br>31498) |
| top-5  | 98.69%<br>(2268/<br>2298) | 95.39%<br>(6741/<br>7067) | 72.12%<br>(6019/<br>8346) | 10.31%<br>(1079/<br>10462) | 0.00%<br>(0/<br>2029) | 53.33%<br>(16107/<br>30202)  | 51.14%<br>(16107/<br>31498) |
| top-10 | 99.70%<br>(2291/<br>2298) | 98.40%<br>(6954/<br>7067) | 85.15%<br>(7107/<br>8346) | 16.93%<br>(1771/<br>10462) | 0.00%<br>(0/<br>2029) | 60.01%<br>(18123/<br>30202)  | 57.54%<br>(18123/<br>31498) |
| top-15 | 99.74%<br>(2292/<br>2298) | 99.19%<br>(7010/<br>7067) | 90.47%<br>(7551/<br>8346) | 21.62%<br>(2262/<br>10462) | 0.00%<br>(0/<br>2029) | 63.29%<br>(19115/<br>30202)  | 60.69%<br>(19115/<br>31498) |

## Similarity-based approach - reduced scope

Standard testing scenario with external data

**Table S5.** Success rates under the standard testing scenario with external data by the similarity approach with a reduced target scope

| median<br>maxTC | [0.8, 1]                    | [0.6, 0.8)                  | [0.4, 0.6)                | [0.2, 0.4)               | [0.0, 0.2)            | overall                     |
|-----------------|-----------------------------|-----------------------------|---------------------------|--------------------------|-----------------------|-----------------------------|
| top-1           | 97.81%<br>(17307/<br>17695) | 88.21%<br>(15177/<br>17205) | 32.28%<br>(1904/<br>5899) | 6.43%<br>(188/<br>2923)  | 4.42%<br>(5/<br>113)  | 78.89%<br>(34581/<br>43835) |
| top-3           | 99.76%<br>(17652/<br>17695) | 96.65%<br>(16629/<br>17205) | 50.18%<br>(2960/<br>5899) | 11.56%<br>(338/<br>2923) | 7.08%<br>(8/<br>113)  | 85.75%<br>(37587/<br>43835) |
| top-5           | 99.96%<br>(17688/<br>17695) | 98.70%<br>(16981/<br>17205) | 60.54%<br>(3571/<br>5899) | 14.64%<br>(428/<br>2923) | 7.96%<br>(9/<br>113)  | 88.23%<br>(38677/<br>43835) |
| top-10          | 99.98%<br>(17692/<br>17695) | 99.72%<br>(17157/<br>17205) | 77.37%<br>(4564/<br>5899) | 20.56%<br>(601/<br>2923) | 7.96%<br>(9/<br>113)  | 91.30%<br>(40023/<br>43835) |
| top-15          | 99.98%<br>(17692/<br>17695) | 99.88%<br>(17185/<br>17205) | 85.61%<br>(5050/<br>5899) | 27.10%<br>(792/<br>2923) | 8.85%<br>(10/<br>113) | 92.91%<br>(40729/<br>43835) |

**Table S6.** Recovery rates under the standard testing scenario with external data by the similarity approach with a reduced target scope

| maxTC  | [0.8, 1]                    | [0.6, 0.8)                  | [0.4, 0.6)                 | [0.2, 0.4)               | [0.0, 0.2)        | overall                     |
|--------|-----------------------------|-----------------------------|----------------------------|--------------------------|-------------------|-----------------------------|
| top-1  | 68.08%<br>(18074/<br>26550) | 55.61%<br>(15174/<br>27287) | 12.59%<br>(1292/<br>10265) | 0.61%<br>(40/ 6528)      | 0.23%<br>(1/ 433) | 48.66%<br>(34581/<br>71063) |
| top-3  | 94.92%<br>(25201/<br>26550) | 85.72%<br>(23391/<br>27287) | 29.00%<br>(2977/<br>10265) | 1.81%<br>(118/<br>6528)  | 0.23%<br>(1/ 433) | 72.74%<br>(51688/<br>71063) |
| top-5  | 98.96%<br>(26275/<br>26550) | 93.73%<br>(25576/<br>27287) | 40.52%<br>(4159/<br>10265) | 3.12%<br>(204/<br>6528)  | 0.46%<br>(2/ 433) | 79.11%<br>(56216/<br>71063) |
| top-10 | 99.87%<br>(26516/<br>26550) | 98.48%<br>(26872/<br>27287) | 61.27%<br>(6289/<br>10265) | 6.31%<br>(412/<br>6528)  | 0.69%<br>(3/ 433) | 84.56%<br>(60092/<br>71063) |
| top-15 | 99.96%<br>(26540/<br>26550) | 99.37%<br>(27114/<br>27287) | 73.27%<br>(7521/<br>10265) | 10.65%<br>(695/<br>6528) | 0.92%<br>(4/ 433) | 87.07%<br>(61874/<br>71063) |

Standard time-split and close-to-real world testing scenarios

**Table S7.** Success rates under the time-split and close-to-real-world testing scenarios by the similarity approach with a reduced target scope

| median<br>maxTC | time-split scenario    |                           |                           |                           |                       | overall                     | close-to-<br>real-world<br>scenario |
|-----------------|------------------------|---------------------------|---------------------------|---------------------------|-----------------------|-----------------------------|-------------------------------------|
|                 | [0.8, 1]               | [0.6, 0.8)                | [0.4, 0.6)                | [0.2, 0.4)                | [0.0, 0.2)            |                             |                                     |
| top-1           | 95.84%<br>(1496/ 1561) | 88.91%<br>(4122/<br>4636) | 58.04%<br>(2971/<br>5119) | 8.51%<br>(532/<br>6251)   | 0.70%<br>(5/ 716)     | 49.92%<br>(9126/<br>18283)  | 45.49%<br>(9126/<br>20061)          |
| top-3           | 98.78%<br>(1542/ 1561) | 96.23%<br>(4461/<br>4636) | 76.75%<br>(3929/<br>5119) | 15.37%<br>(961/<br>6251)  | 0.84%<br>(6/ 716)     | 59.61%<br>(10899/<br>18283) | 54.33%<br>(10899/<br>20061)         |
| top-5           | 99.74%<br>(1557/ 1561) | 97.58%<br>(4524/<br>4636) | 82.77%<br>(4237/<br>5119) | 19.53%<br>(1221/<br>6251) | 1.54%<br>(11/<br>716) | 63.17%<br>(11550/<br>18283) | 57.57%<br>(11550/<br>20061)         |
| top-10          | 99.87%<br>(1559/ 1561) | 99.29%<br>(4603/<br>4636) | 90.56%<br>(4636/<br>5119) | 26.25%<br>(1641/<br>6251) | 1.96%<br>(14/<br>716) | 68.11%<br>(12453/<br>18283) | 62.08%<br>(12453/<br>20061)         |
| top-15          | 99.87%<br>(1559/ 1561) | 99.72%<br>(4623/<br>4636) | 94.30%<br>(4827/<br>5119) | 31.04%<br>(1940/<br>6251) | 2.23%<br>(16/<br>716) | 70.91%<br>(12965/<br>18283) | 64.63%<br>(12965/<br>20061)         |

**Table S8.** Recovery rates under the time-split and close-to-real-world testing scenarios with by the similarity approach with a reduced target scope

| maxTC  | time-split scenario       |                           |                           |                           |                       |                             | close-to-real-world scenario |
|--------|---------------------------|---------------------------|---------------------------|---------------------------|-----------------------|-----------------------------|------------------------------|
|        | [0.8, 1]                  | [0.6, 0.8]                | [0.4, 0.6]                | [0.2, 0.4]                | [0.0, 0.2]            | overall                     |                              |
| top-1  | 71.53%<br>(1583/<br>2213) | 63.97%<br>(4368/<br>6828) | 36.22%<br>(2904/<br>8018) | 2.75%<br>(271/<br>9860)   | 0.00%<br>(0/<br>1198) | 32.46%<br>(9126/<br>28117)  | 28.97%<br>(9126/<br>31498)   |
| top-3  | 94.62%<br>(2094/<br>2213) | 89.81%<br>(6132/<br>6828) | 62.91%<br>(5044/<br>8018) | 7.22%<br>(712/<br>9860)   | 0.00%<br>(0/<br>1198) | 49.73%<br>(13982/<br>28117) | 44.39%<br>(13982/<br>31498)  |
| top-5  | 98.78%<br>(2186/<br>2213) | 95.88%<br>(6547/<br>6828) | 73.15%<br>(5865/<br>8018) | 10.87%<br>(1072/<br>9860) | 0.00%<br>(0/<br>1198) | 55.73%<br>(15670/<br>28117) | 49.75%<br>(15670/<br>31498)  |
| top-10 | 99.77%<br>(2208/<br>2213) | 98.68%<br>(6738/<br>6828) | 85.88%<br>(6886/<br>8018) | 17.58%<br>(1733/<br>9860) | 0.00%<br>(0/<br>1198) | 62.47%<br>(17565/<br>28117) | 55.77%<br>(17565/<br>31498)  |
| top-15 | 99.77%<br>(2208/<br>2213) | 99.36%<br>(6784/<br>6828) | 91.16%<br>(7309/<br>8018) | 22.28%<br>(2197/<br>9860) | 0.00%<br>(0/<br>1198) | 65.79%<br>(18498/<br>28117) | 58.73%<br>(18498/<br>31498)  |



## ML approach

Standard testing scenario with external data

**Table S9.** Success rates under the standard testing scenario with external data by the ML approach

| median<br>maxTC | [0.8, 1]                    | [0.6, 0.8)                  | [0.4, 0.6)                | [0.2, 0.4)                | [0.0, 0.2)             | overall                     |
|-----------------|-----------------------------|-----------------------------|---------------------------|---------------------------|------------------------|-----------------------------|
| top-1           | 94.93%<br>(16797/<br>17695) | 80.73%<br>(13889/<br>17205) | 28.16%<br>(1661/<br>5899) | 6.47%<br>(189/<br>2923)   | 2.65%<br>(3/<br>113)   | 74.23%<br>(32539/<br>43835) |
| top-3           | 98.82%<br>(17487/<br>17695) | 90.32%<br>(15540/<br>17205) | 44.96%<br>(2652/<br>5899) | 14.47%<br>(423/<br>2923)  | 4.42%<br>(5/<br>113)   | 82.37%<br>(36107/<br>43835) |
| top-5           | 99.38%<br>(17586/<br>17695) | 93.57%<br>(16098/<br>17205) | 54.08%<br>(3190/<br>5899) | 21.28%<br>(622/<br>2923)  | 6.19%<br>(7/<br>113)   | 85.55%<br>(37503/<br>43835) |
| top-10          | 99.73%<br>(17648/<br>17695) | 96.30%<br>(16569/<br>17205) | 66.86%<br>(3944/<br>5899) | 31.06%<br>(908/<br>2923)  | 12.39%<br>(14/<br>113) | 89.16%<br>(39083/<br>43835) |
| top-15          | 99.84%<br>(17667/<br>17695) | 97.49%<br>(16773/<br>17205) | 74.47%<br>(4393/<br>5899) | 37.46%<br>(1095/<br>2923) | 15.93%<br>(18/<br>113) | 91.13%<br>(39946/<br>43835) |

**Table S10.** Recovery rates under the standard testing scenario with external data by the ML approach

| maxTC  | [0.8, 1]                    | [0.6, 0.8)                  | [0.4, 0.6)                 | [0.2, 0.4)                | [0.0, 0.2)            | overall                     |
|--------|-----------------------------|-----------------------------|----------------------------|---------------------------|-----------------------|-----------------------------|
| top-1  | 65.62%<br>(17423/<br>26550) | 50.49%<br>(13777/<br>27287) | 12.06%<br>(1238/<br>10265) | 1.53%<br>(100/<br>6528)   | 0.23%<br>(1/ 433)     | 45.79%<br>(32539/<br>71063) |
| top-3  | 92.63%<br>(24594/<br>26550) | 77.73%<br>(21209/<br>27287) | 25.54%<br>(2622/<br>10265) | 5.02%<br>(328/<br>6528)   | 0.69%<br>(3/ 433)     | 68.61%<br>(48756/<br>71063) |
| top-5  | 97.65%<br>(25927/<br>26550) | 85.82%<br>(23418/<br>27287) | 34.60%<br>(3552/<br>10265) | 8.53%<br>(557/<br>6528)   | 1.39%<br>(6/ 433)     | 75.23%<br>(53460/<br>71063) |
| top-10 | 99.30%<br>(26364/<br>26550) | 92.33%<br>(25193/<br>27287) | 48.76%<br>(5005/<br>10265) | 14.81%<br>(967/<br>6528)  | 3.70%<br>(16/<br>433) | 80.98%<br>(57545/<br>71063) |
| top-15 | 99.66%<br>(26461/<br>26550) | 94.86%<br>(25885/<br>27287) | 57.99%<br>(5953/<br>10265) | 19.87%<br>(1297/<br>6528) | 4.85%<br>(21/<br>433) | 83.89%<br>(59617/<br>71063) |

Standard time-split and close-to-real world testing scenarios

**Table S11.** Success rates under the time-split and close-to-real-world testing scenarios by the ML approach

|        | time-split scenario    |                           |                           |                           |                   |                             | close-to-real-world scenario |
|--------|------------------------|---------------------------|---------------------------|---------------------------|-------------------|-----------------------------|------------------------------|
|        | median [0.8, 1]        | [0.6, 0.8]                | [0.4, 0.6]                | [0.2, 0.4]                | [0.0, 0.2]        | overall                     |                              |
| maxTC  |                        |                           |                           |                           |                   |                             |                              |
| top-1  | 90.01%<br>(1405/ 1561) | 80.20%<br>(3718/<br>4636) | 47.86%<br>(2450/<br>5119) | 7.04%<br>(440/<br>6251)   | 0.42%<br>(3/ 716) | 43.84%<br>(8016/<br>18283)  | 39.96%<br>(8016/<br>20061)   |
| top-3  | 96.28%<br>(1503/ 1561) | 90.55%<br>(4198/<br>4636) | 64.43%<br>(3298/<br>5119) | 12.01%<br>(751/<br>6251)  | 0.42%<br>(3/ 716) | 53.34%<br>(9753/<br>18283)  | 48.62%<br>(9753/<br>20061)   |
| top-5  | 98.40%<br>(1536/ 1561) | 93.21%<br>(4321/<br>4636) | 70.38%<br>(3603/<br>5119) | 15.95%<br>(997/<br>6251)  | 0.70%<br>(5/ 716) | 57.22%<br>(10462/<br>18283) | 52.15%<br>(10462/<br>20061)  |
| top-10 | 99.30%<br>(1550/ 1561) | 96.05%<br>(4453/<br>4636) | 77.93%<br>(3989/<br>5119) | 21.52%<br>(1345/<br>6251) | 1.12%<br>(8/ 716) | 62.05%<br>(11345/<br>18283) | 56.55%<br>(11345/<br>20061)  |
| top-15 | 99.62%<br>(1555/ 1561) | 97.43%<br>(4517/<br>4636) | 81.46%<br>(4170/<br>5119) | 25.05%<br>(1566/<br>6251) | 1.26%<br>(9/ 716) | 64.63%<br>(11817/<br>18283) | 58.91%<br>(11817/<br>20061)  |

**Table S12.** Recovery rates under the time-split and close-to-real-world testing scenarios with by the ML approach

|        | time-split scenario       |                           |                           |                           |                       |                             | close-to-real-world scenario |
|--------|---------------------------|---------------------------|---------------------------|---------------------------|-----------------------|-----------------------------|------------------------------|
|        | maxTC [0.8, 1]            | [0.6, 0.8)                | [0.4, 0.6)                | [0.2, 0.4)                | [0.0, 0.2)            | overall                     |                              |
| top-1  | 67.06%<br>(1484/<br>2213) | 57.45%<br>(3923/<br>6828) | 29.13%<br>(2336/<br>8018) | 2.77%<br>(273/<br>9860)   | 0.00%<br>(0/<br>1198) | 28.51%<br>(8016/<br>28117)  | 25.45%<br>(8016/<br>31498)   |
| top-3  | 91.55%<br>(2026/<br>2213) | 82.70%<br>(5647/<br>6828) | 50.86%<br>(4078/<br>8018) | 7.03%<br>(693/<br>9860)   | 0.00%<br>(0/<br>1198) | 44.26%<br>(12444/<br>28117) | 39.51%<br>(12444/<br>31498)  |
| top-5  | 95.39%<br>(2111/<br>2213) | 89.22%<br>(6092/<br>6828) | 60.50%<br>(4851/<br>8018) | 10.75%<br>(1060/<br>9860) | 0.00%<br>(0/<br>1198) | 50.20%<br>(14114/<br>28117) | 44.81%<br>(14114/<br>31498)  |
| top-10 | 98.73%<br>(2185/<br>2213) | 93.85%<br>(6408/<br>6828) | 72.11%<br>(5782/<br>8018) | 16.33%<br>(1610/<br>9860) | 0.08%<br>(1/<br>1198) | 56.86%<br>(15986/<br>28117) | 50.75%<br>(15986/<br>31498)  |
| top-15 | 99.14%<br>(2194/<br>2213) | 96.28%<br>(6574/<br>6828) | 76.93%<br>(6168/<br>8018) | 20.23%<br>(1995/<br>9860) | 0.17%<br>(2/<br>1198) | 60.22%<br>(16933/<br>28117) | 53.76%<br>(16933/<br>31498)  |
